# Supplementary material for: An antimony based organic–inorganic hybrid coating material with high quantum efficiency and thermal quenching effect
Source: Royal Society of Chemistry journal article supplement (doi:10.1039/d0cc07392j), 2021-01-01
Supplement: d0cc07392j1.pdf [file d0cc07392j1.pdf]

## Supporting information

### Antimony based organic-inorganic hybrid coating material with high quantum efficiency and thermal quenching effect

Fang Lin,<sup>a</sup> Hao Wang,<sup>a</sup> Haoran Lin,<sup>a</sup> Wei Liu\*,<sup>c</sup> and Jing Li\*,<sup>b,a</sup>

<sup>a</sup> Hoffmann Institute of Advanced Materials, Shenzhen Polytechnic, 7098 Liuxian Blvd, Nanshan District, Shenzhen, 518055, China

<sup>b</sup> Department of Chemistry and Chemical Biology, Rutgers University, 610 Taylor Road, Piscataway, NJ, 08854, USA

<sup>c</sup> School of Chemical Engineering and Technology, Sun Yat-Sen University, Zhuhai, 519082, China

**Materials.** SbCl<sub>3</sub> (99.9% metals basis), 1-carboxymethyl-3-methylimidazolium chloride (98%) acetonitrile (>99%), ethylacetate (AR, 99% ) were purchased from Aladdin. All reagents and solvents were used without further purification unless otherwise stated.

**Single crystal synthesis of 1.** A mixture of SbCl<sub>3</sub> (0.0228 g, 0.1 mmol), 1-carboxymethyl-3-methylimidazolium chloride (0.0354 g, 0.2 mmol) in acetonitrile (6 mL) and ethylacetate (2 mL) was stirred in a 20 mL glass bottle for 1 hour to form a white precipitate. The mixture was then sealed in a Teflon-lined bomb and heated to a temperature of 120 °C for 3 days and cooled slowly to room temperature. Colorless crystals and white polycrystalline powder were slowly precipitated out from the solution. Upon completion of the reaction, powder sample of **1** was collected by filtration from the reaction solution and washed with a small amount of acetonitrile for three times. The sample was then dried in a vacuum oven overnight before other measurements were made.

**Single crystal X-ray diffraction (SXRD).** Single crystal X-ray diffraction data were collected at 173 K on a Bruker D8 Venture diffractometer with graphite-monochromated Ga K $\alpha$  radiation ( $\lambda = 1.34139$  Å) The structure was solved by direct methods and refined by full-matrix least-squares on F<sup>2</sup> using the Bruker SHELXTL package. These data can be obtained free of charge from The Cambridge Crystallographic Data Centre via [www.ccdc.cam.ac.uk/data\\_request/cif](http://www.ccdc.cam.ac.uk/data_request/cif). The structure was deposited in Cambridge Structural Database (CSD) and the number is 1960644.

**Powder X-ray diffraction (PXRD).** PXRD analyses were carried out on a Bruker D8 Advance automated diffraction system using Cu K $\alpha$  radiation ( $\lambda=1.5406$  Å). The data were collected at room temperature in a 2 $\theta$  range of 3-50° with a scan speed of 1°/min.

The operating power was 40 kV/40 mA.

**Optical diffuse reflectance measurements.** Optical diffuse reflectance spectra were measured at room temperature on a Shimadzu UV-3600 spectrophotometer. Data were collected in the wavelength range of 300-1200 nm. BaSO<sub>4</sub> powder was used as a standard (100% reflectance). A similar procedure as previously described was used to collect and convert the data using the Kubelka-Munk function. The scattering coefficient (S) was treated as a constant since the average particle size of the samples used in the measurements was significantly larger than 5  $\mu\text{m}$ .

**Thermogravimetric (TG) analysis.** TG analysis of the title compound was performed on a computer-controlled TG 550 (TA Instrument). Pure powder sample was loaded into platinum pans and heated with a ramp rate of 10  $^{\circ}\text{C}/\text{min}$  from room temperature to 700  $^{\circ}\text{C}$ .

**Excitation spectrum measurements.** Excitation spectra were measured at room temperature on a FLS1000 spectrofluorometer (Edinburgh Instruments) monitored at maximum of emission spectra.

**Photoluminescence measurements.** Steady-state photoluminescence spectra were obtained at room temperature and 77 K (liquid nitrogen was used to cool the samples) on a FLS1000 spectrofluorometer.

**Internal quantum yield measurements.** Internal quantum yield (IQY) of the sample in powder form was measured on a C9920-03 absolute quantum yield measurement system (Hamamatsu Photonics) with a 150 W xenon monochromatic light source and 3.3 inch integrating sphere.

**Time-resolved photoluminescence.** Time-Resolved Emission data were collected at room temperature using the FLS1000 spectrofluorometer. The dynamics of emission decay were monitored by using the FLS1000's time-correlated single-photon counting capability (1024 channels; 10  $\mu\text{s}$  window) with data collection for 10,000 counts. Excitation was provided by an Edinburgh EPL-360 picosecond pulsed diode laser. Long lifetime measurements at 77K (1024 channels; 800  $\mu\text{s}$  window) were collected using Xe flash lamp as the excitation source. The lifetime was obtained by mono-exponential fitting.

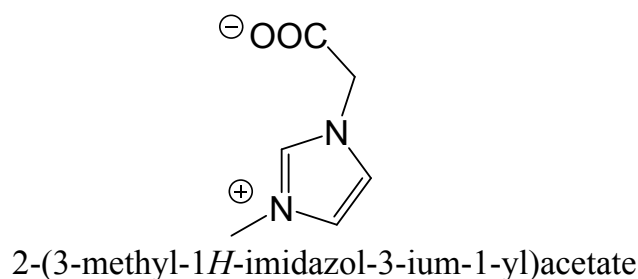

Figure S1. Structural plot of the organic ligand.

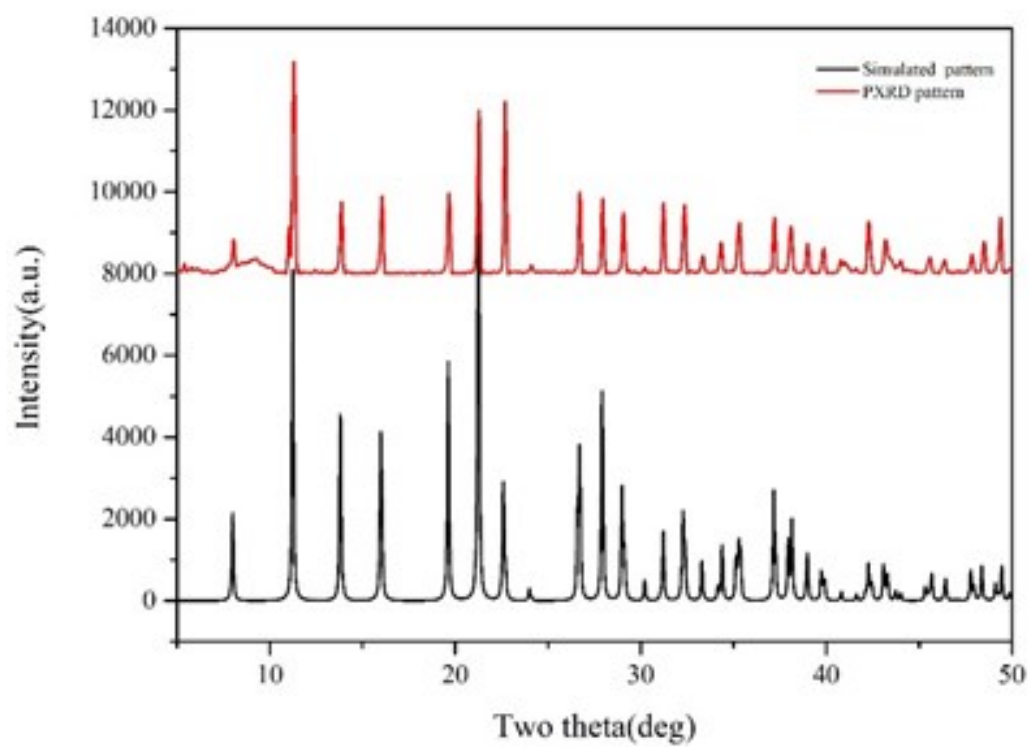

Figure S2. PXRD patterns of the as-made (top) and simulated pattern (bottom) of compound **1**.

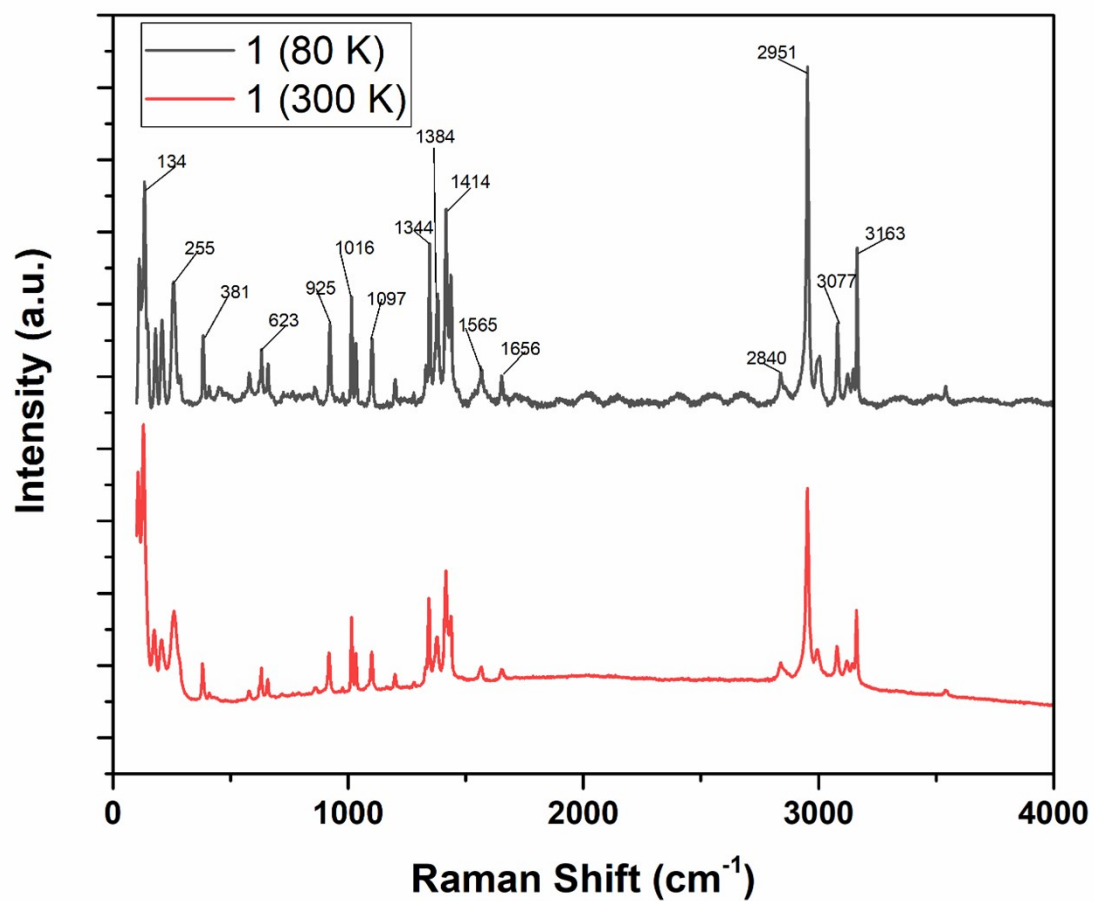

Figure S2a. Raman spectra of compound **1** at 300 K and 80 K.

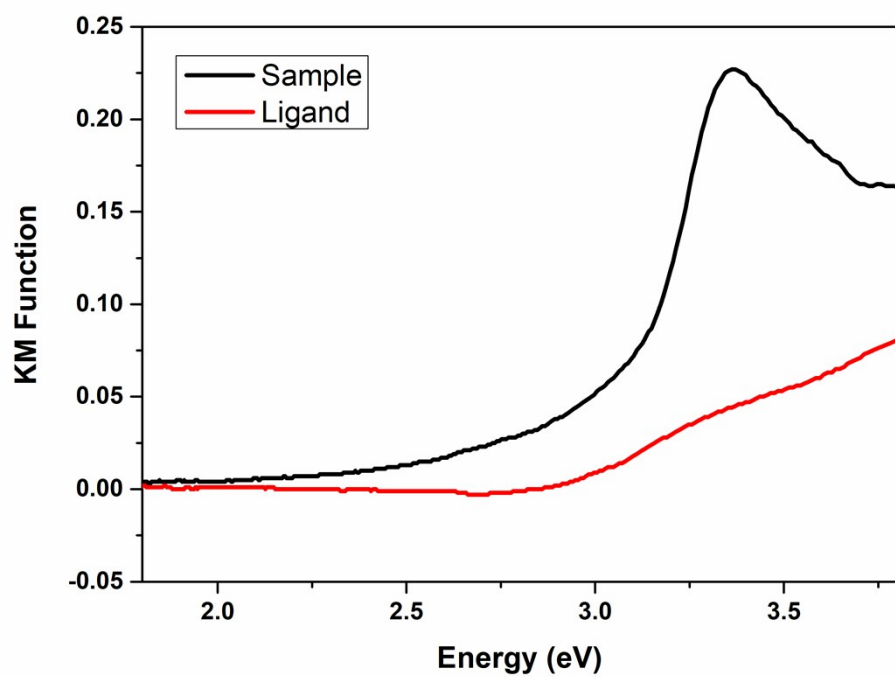

Figure S3. Optical absorption spectrum of compound **1** and ligand.

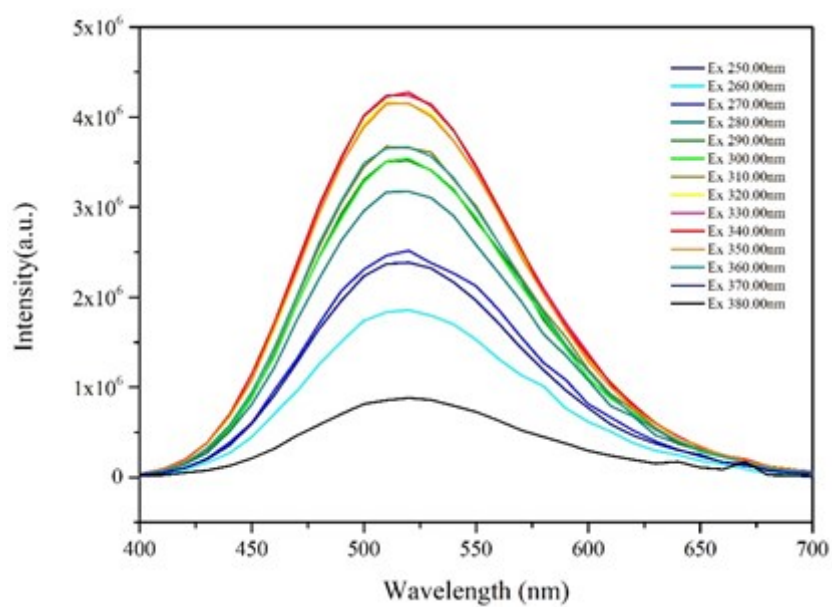

Figure S4. Emission spectra of **1** under various excitation energies.

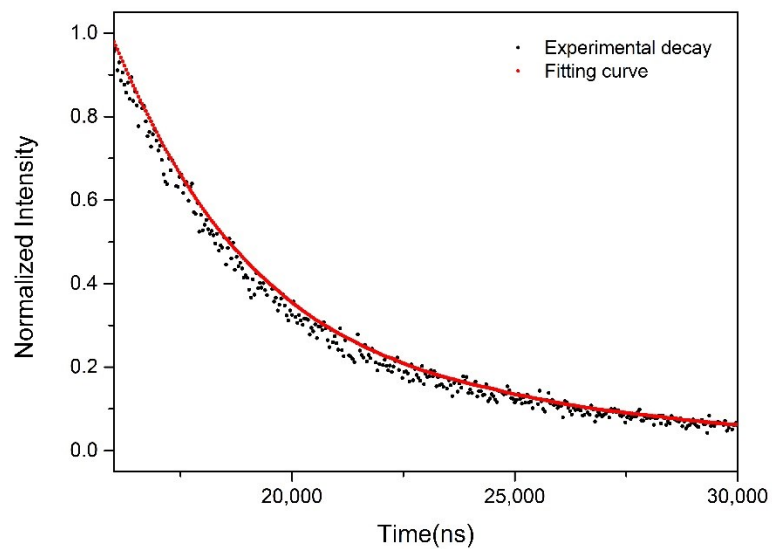

Figure S5. Luminescence decay curve of compound **1** at room temperature.

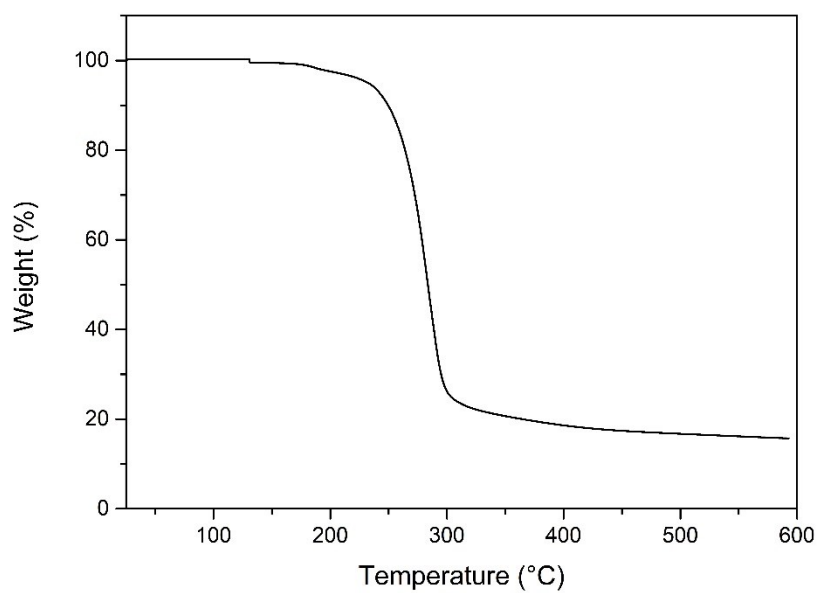

Figure S6. TGA plot of compound **1**.

Table S1. Single crystal X-ray diffraction data of compound **1**

|          |                                                                            |
|----------|----------------------------------------------------------------------------|
| Compound | <b>1</b>                                                                   |
| Formula  | $\text{C}_{36}\text{H}_{54}\text{Cl}_6\text{N}_{12}\text{O}_{12}\text{Sb}$ |

|                              |              |
|------------------------------|--------------|
| Fw                           | 1181.36      |
| Space Group                  | R3           |
| a (Å)                        | 22.0964 (5)  |
| b (Å)                        | 22.0964 (5)  |
| c (Å)                        | 8.6309 (2)   |
| $\alpha(^{\circ})$           | 90           |
| $\beta(^{\circ})$            | 90           |
| $\gamma(^{\circ})$           | 120          |
| V (Å <sup>3</sup> )          | 3649.47 (19) |
| Z                            | 3            |
| T (K)                        | 173 (2)      |
| $\lambda$ (Å)                | 1.34139      |
| $\rho$ (g·cm <sup>-3</sup> ) | 1.613        |
| Rwp                          | 0.1892       |
| Rp                           | 0.0648       |
